# Supplementary material for: A facile approach to enhance the hydrogen evolution reaction of electrodeposited MoS2 in acidic solutions
Source: Royal Society of Chemistry journal article supplement (doi:10.1039/d2nj04547h), 2022-01-01
Supplement: d2nj04547h1.pdf [file d2nj04547h1.pdf]

## A Facile Approach to Enhance Hydrogen Evolution Reaction of Electrodeposited MoS<sub>2</sub> in Acidic Solutions

Tianyue Liang,<sup>a</sup> Haowei Jia,<sup>a</sup> Yingze Zhou,<sup>a</sup> Jiajun Fan,<sup>a</sup> Yeqing Xu,<sup>b</sup> Yifan Hu,<sup>a</sup> Lu Zhou,<sup>a</sup> Caiyun Wang,<sup>b</sup> Fandi Chen,<sup>a</sup> Peiyuan Guan,<sup>\*a</sup> Mengyao Li,<sup>\*a</sup> Tao Wan,<sup>\*a</sup> Michael Ferry,<sup>a</sup> Dewei Chu<sup>a</sup>

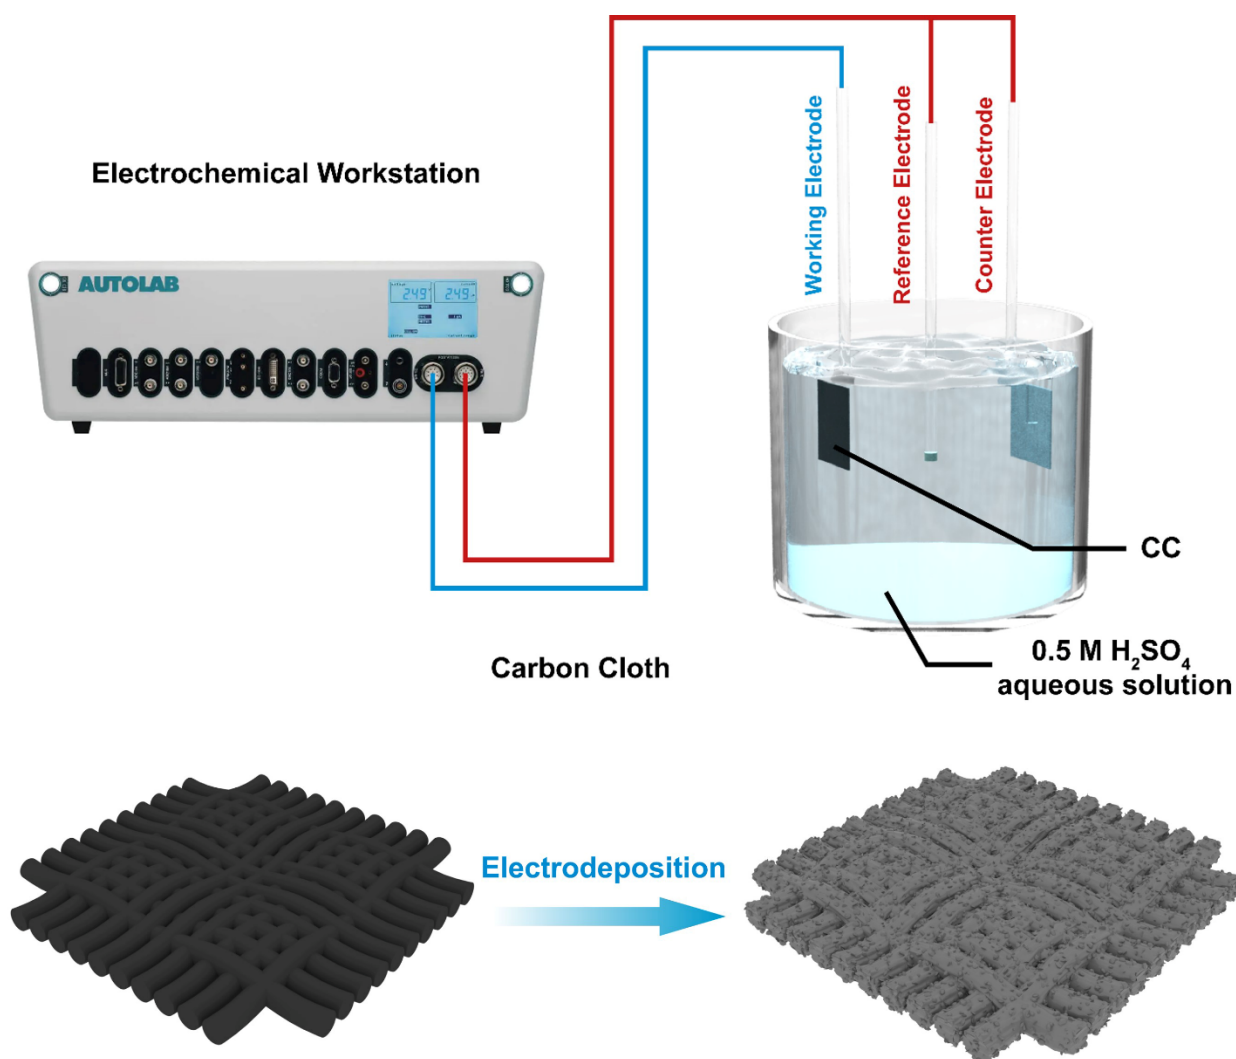

Fig. S1. Schematic illustration of syntheses and electrochemical measurements of MoS<sub>2</sub> and Ni<sub>x</sub>Mo<sub>1-x</sub>S<sub>2</sub> on carbon fiber cloth.

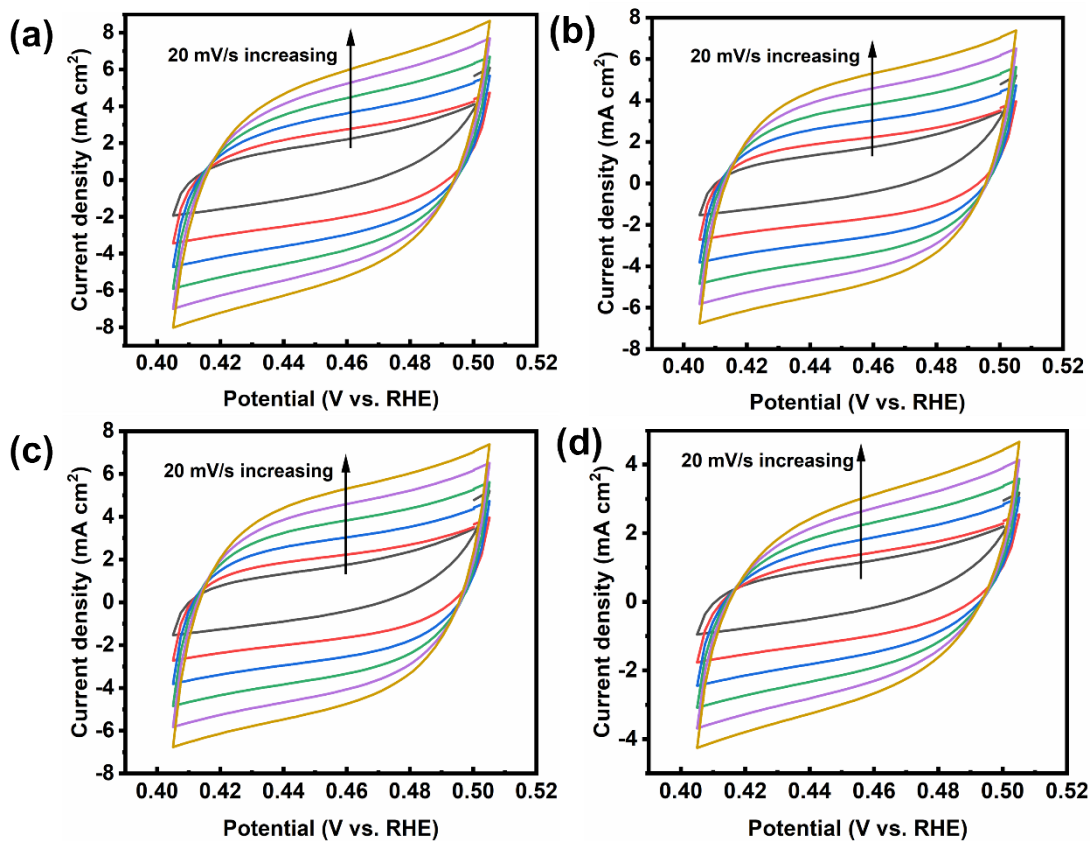

Fig. S2. CV curves in the non-faradaic region at the scan rates of 20, 40, 60, 80, 100 and 120 mV/s for sample (a) MoS<sub>2</sub>, (b) Ni<sub>0.02</sub>Mo<sub>0.98</sub>S<sub>2</sub> (c) Ni<sub>0.05</sub>Mo<sub>0.95</sub>S<sub>2</sub> and d) Ni<sub>0.1</sub>Mo<sub>0.99</sub>S<sub>2</sub>.

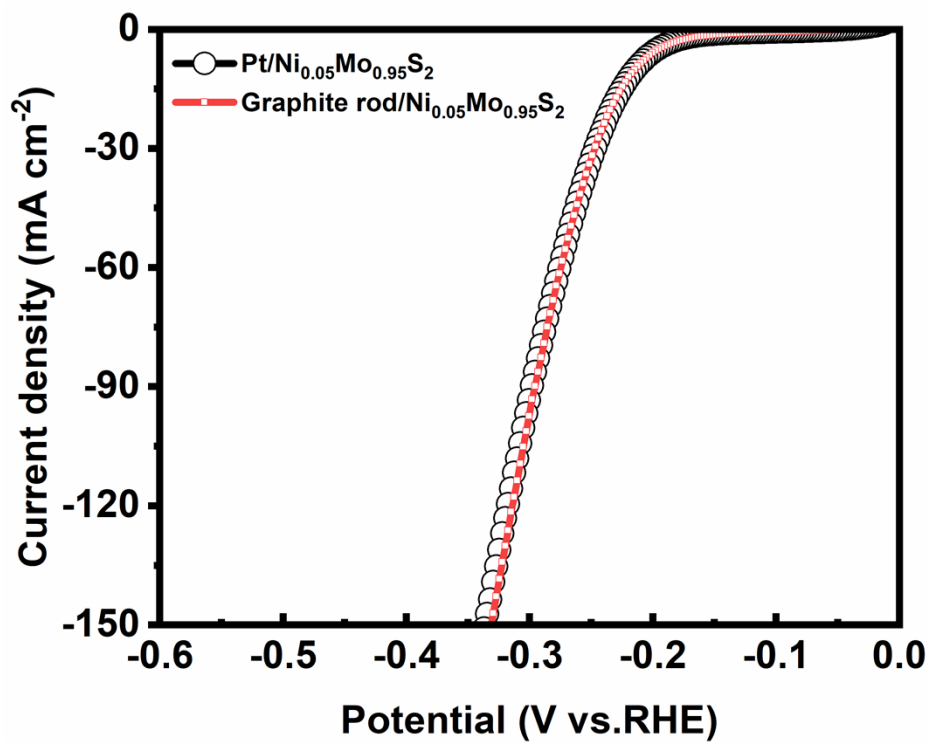

Fig. S3. LSV curves measuring by Pt and graphite rod as counter electrodes for sample  $\text{Ni}_{0.05}\text{Mo}_{0.95}\text{S}_2$ .

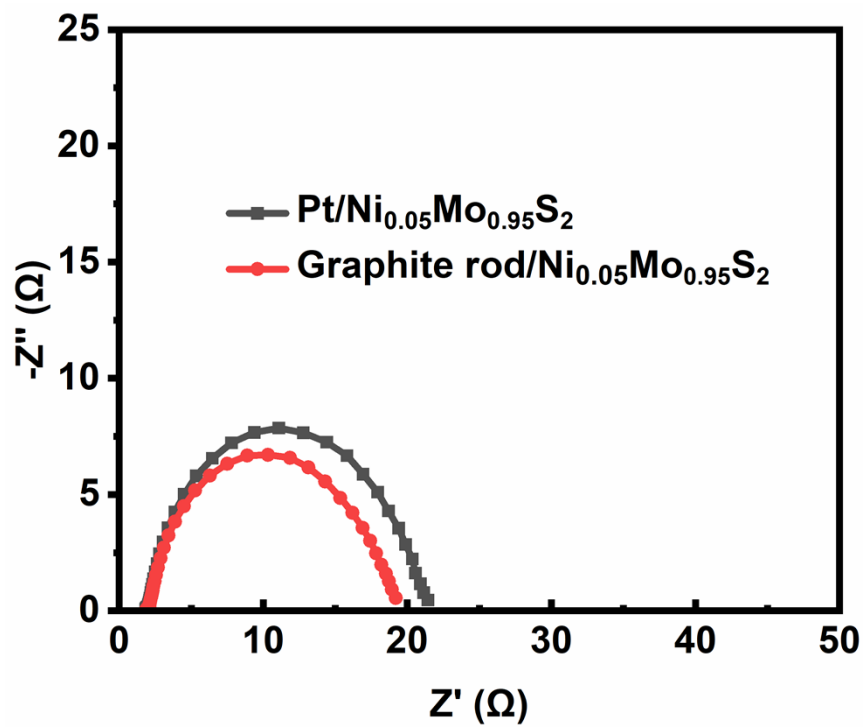

Fig. S4. EIS measurement with Pt and graphite rod as counter electrodes for sample  $\text{Ni}_{0.05}\text{Mo}_{0.95}\text{S}_2$ .

Table S1. Summary of HER performance for as-prepared samples.  $R_{ct}$  is calculated by EIS data. ESCA is calculated by  $C_{dl}$  data.

| <b>Catalysts</b>                                               | <b>Onset potential (mV)</b> | <b><math>\eta</math> (mV) at <math>j=10 \text{ mA}^{-2}</math></b> | <b><math>R_{ct}</math> (<math>\Omega</math>)</b> | <b>ECSA (<math>\text{cm}^{-2}</math>)</b> |
|----------------------------------------------------------------|-----------------------------|--------------------------------------------------------------------|--------------------------------------------------|-------------------------------------------|
| $\text{MoS}_2$                                                 | 197                         | 293                                                                | 40.45                                            | 550                                       |
| $\text{Ni}_{0.1}\text{Mo}_{0.9}\text{S}_2$                     | 175                         | 232                                                                | 27.35                                            | 972.5                                     |
| <b><math>\text{Ni}_{0.05}\text{Mo}_{0.95}\text{S}_2</math></b> | <b>139</b>                  | <b>215</b>                                                         | <b>5.96</b>                                      | <b>1062.5</b>                             |
| $\text{Ni}_{0.02}\text{Mo}_{0.98}\text{S}_2$                   | 158                         | 241                                                                | 18.45                                            | 990                                       |

Table S2. Summary of HER performance for as-prepared sample  $\text{Ni}_{0.05}\text{Mo}_{0.95}\text{S}_2$  with Pt and graphite rod as counter electrodes.  $R_{ct}$  is calculated by EIS data.

|                             | <b>Pt</b> | <b>Graphite rod</b> |
|-----------------------------|-----------|---------------------|
| <b>Real Center</b>          | 11.52     | 10.48               |
| <b>Imag. Center</b>         | -2        | -2.06               |
| <b>Diameter</b>             | 19.58     | 17.48               |
| <b>Deviation</b>            | 0.12      | 0.13                |
| <b>Low Intercept</b>        | 1.95      | 1.99                |
| <b>High Intercept</b>       | 21.1      | 18.97               |
| <b>Depression Angle</b>     | -11.85    | -13.65              |
| <b>w max</b>                | 1.18      | 1.23                |
| <b>Estimated R (ohms)</b>   | 19.12     | 16.98               |
| <b>Estimated C (farads)</b> | 0.04      | 0.05                |

Table S3. EDS analysis of as-prepared sample  $\text{Ni}_{0.1}\text{Mo}_{0.99}\text{S}_2$ .

| Element    | AN | series   | Net    | [wt.%]   | [norm. wt.%] | [norm. at.%] | Error in wt.% (1 Sigma) |
|------------|----|----------|--------|----------|--------------|--------------|-------------------------|
| Sulfur     | 16 | K-series | 258889 | 17.05879 | 47.48971     | 72.62935     | 0.635963                |
| Nickel     | 28 | K-series | 5398   | 0.586278 | 1.63213      | 1.363713     | 0.042993                |
| Molybdenum | 42 | L-series | 167426 | 18.27596 | 50.87816     | 26.00693     | 0.673986                |
|            |    |          | Sum:   | 35.92102 | 100          | 100          |                         |

The ratios of Ni and Mo in the electrodeposited samples were measured by EDS in SEM, since EDS cannot detect incorporation below 0.5%, we detected 1% Ni samples, the at% of Ni is 1.36%, which is close to the nominal doping concentration and the fluctuation may be caused by the incomplete reaction of Mo and accuracy of EDS.
